# Supplementary material
Source: PubMed Central journal article supplement (PMC5665665)
Supplement: 10.1194_M076901_jlr.M076901-1.pdf [file 10.1194_M076901_jlr.M076901-1.pdf]

Supplemental material

Supplement to:

**The effect of adding bezafibrate to standard lipid-lowering therapy on fasting and post-fat load lipids in patients with Familial Dysbetalipoproteinemia. A randomized, placebo-controlled, crossover trial.**

C. Koopal, MD, A. David Marais, MD, Jan Westerink, MD PhD, Y. van der Graaf, MD PhD, F.L.J. Visseren, MD PhD

To whom correspondence should be addressed:

Email: [F.L.J.Visseren@umcutrecht.nl](mailto:F.L.J.Visseren@umcutrecht.nl)

**Supplemental Table S1:** Reported side effects.

| <b>Pt</b> | <b>Side-effect</b>                                      | <b>Study drug</b>     | <b>Background lipid lowering therapy</b>         |
|-----------|---------------------------------------------------------|-----------------------|--------------------------------------------------|
| 1         | Gastro-intestinal complaints                            | Bezafibrate           | Lifestyle + simvastatin 40 mg + ezetimibe 10 mg  |
| 2         | Increase in former complaints of fatigue and flatulence | Placebo               | Lifestyle + atorvastatin 10 mg                   |
| 3         | Myalgia + CK 1718 U/L                                   | Bezafibrate           | Lifestyle                                        |
| 4         | Myalgia                                                 | Placebo + Bezafibrate | Lifestyle + atorvastatin 20 mg                   |
| 5         | Myalgia                                                 | Placebo + Bezafibrate | Lifestyle + simvastatin 40 mg                    |
| 6         | Myalgia                                                 | Placebo               | Lifestyle                                        |
| 7         | Gastro-intestinal complaints                            | Placebo               | Lifestyle + atorvastatin 10 mg + ezetimibe 10 mg |
